# Supplementary material for: Identification of hub genes and pathways in lung metastatic colorectal cancer
Source: PubMed Central journal article supplement (PMC10080892; doi:10.1186/s12885-023-10792-8), 2023-04-06
Supplement: 12885_2023_10792_MOESM2_ESM.pdf [file 12885_2023_10792_MOESM2_ESM.pdf]

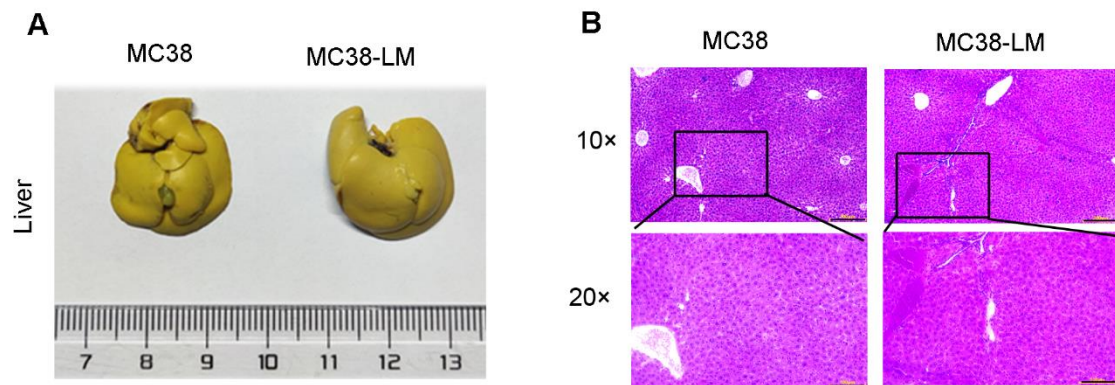

**Fig. S2. No liver metastatic nodules were found in the lung metastatic mouse model. (A)** Representative images of liver after Bouin's fixation for one week. **(B)** Representative images of H&E staining of liver section. Scale bar: 200  $\mu\text{m}$  (10 $\times$ ), 100  $\mu\text{m}$  (20 $\times$ ).
