# Supplementary material for: Identification of hub genes and pathways in lung metastatic colorectal cancer
Source: PubMed Central journal article supplement (PMC10080892; doi:10.1186/s12885-023-10792-8), 2023-04-06
Supplement: 12885_2023_10792_MOESM3_ESM.pdf [file 12885_2023_10792_MOESM3_ESM.pdf]

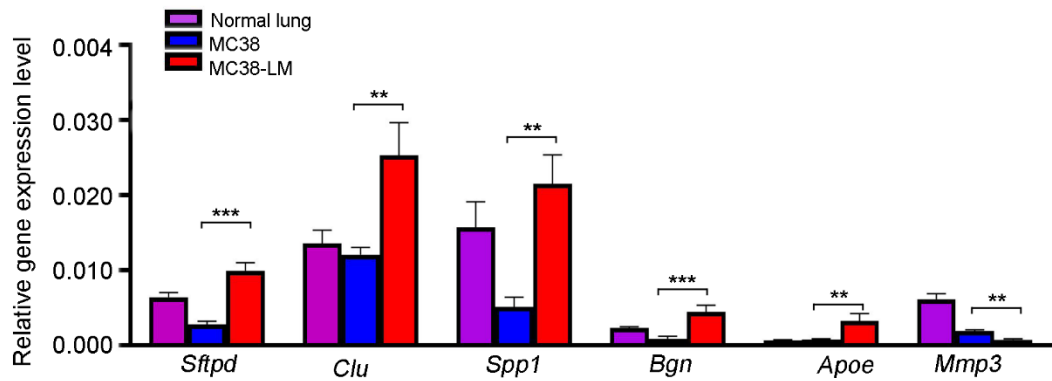

**Fig. S3. qRT-PCR analyses of hub genes expression in mouse normal lung tissues, primary MC38 cells and lung metastatic MC38 cells. (A)** The mRNA levels of *Sftpd*, *Clu*, *Spp1*, *Apoe*, *Bgn* and *Mmp3* in mouse normal lung tissues, primary MC38 cells and lung metastatic MC38 cells are shown. The data were normally distributed, and one-way ANOVA with *post hoc* intergroup comparison was used. \*\*,  $P < 0.01$ ; \*\*\*,  $P < 0.001$ . Data are shown as means  $\pm$  SD,  $n \geq 3$ ; A  $P < 0.05$  was considered significant.
