# Supplementary material for: Identification of hub genes and pathways in lung metastatic colorectal cancer
Source: PubMed Central journal article supplement (PMC10080892; doi:10.1186/s12885-023-10792-8), 2023-04-06
Supplement: 12885_2023_10792_MOESM4_ESM.pdf [file 12885_2023_10792_MOESM4_ESM.pdf]

**Table S1. Mouse primers for qRT-PCR**

| Gene         | Forward                      | Reverse                     |
|--------------|------------------------------|-----------------------------|
| <i>Sftpd</i> | 5'-TCTCCCACTATCAGAAAGCTGC-3' | 5'-CTCAGTAGCAGAACGTGGGG-3'  |
| <i>Clu</i>   | 5'-GGGGTGTACTTGAGCAGAGC-3'   | 5'-TCCTTGAATCTGGAGTCCGG-3'  |
| <i>Spp1</i>  | 5'-AGGAAACCAGCCAAGGACTAAC-3' | 5'-GCTTCTTCCTCTGAGCTGC-3'   |
| <i>Bgn</i>   | 5'-GCGGAAGCTGCAAAAAGTCT-3'   | 5'-ACCTGTGTCCTTTATGCCTGA-3' |
| <i>ApoE</i>  | 5'-GTCCCAGCCTTGAATGGAA-3'    | 5'-GCTGGTCAGCCTAAACTGGAA-3' |
| <i>Mmp3</i>  | 5'-CAGTCCCTCTATGGAAGTCCC-3'  | 5'-AGGGTGCTGACTGCATCAAA-3'  |
| <i>Gapdh</i> | 5'-ACCTTAAGAGGGATGCTGC-3'    | 5'-CCCAATACGGCCAAATCCGT-3'  |
