# Supplementary material for: Identification of hub genes and pathways in lung metastatic colorectal cancer
Source: PubMed Central journal article supplement (PMC10080892; doi:10.1186/s12885-023-10792-8), 2023-04-06
Supplement: 12885_2023_10792_MOESM5_ESM.pdf [file 12885_2023_10792_MOESM5_ESM.pdf]

**Table S2. The fifty-seven upregulated DEGs in the GSE41258 and GSE68468 dataset**

| Gene<br>Symbol | Gene ID   | Log <sub>2</sub> FC<br>in GSE41258 | Log <sub>2</sub> FC<br>in GSE68468 | Adj <i>P</i> Value<br>in GSE41258 | Adj <i>P</i> Value<br>in GSE68468 |
|----------------|-----------|------------------------------------|------------------------------------|-----------------------------------|-----------------------------------|
| SFTPC          | 6440      | 8.3322819                          | 5.9318462                          | 1.36E-136                         | 3.59E-71                          |
| SFTPB          | 6439      | 6.479101                           | 6.124719                           | 1.37E-84                          | 1.54E-66                          |
| SFTPD          | 6441      | 6.0460797                          | 4.8391114                          | 3.35E-65                          | 1.77E-58                          |
| SFTPA2         | 729238    | 5.7916673                          | 6.19483                            | 1.57E-64                          | 3.69E-68                          |
| SCGB1A1        | 7356      | 2.4725687                          | 3.3677696                          | 2.23E-15                          | 1.10E-24                          |
| LTF            | 4057      | 2.2917249                          | 4.1286066                          | 1.29E-17                          | 4.94E-27                          |
| CCL18          | 6362      | 1.99271                            | 2.2897545                          | 0.000103                          | 2.70E-04                          |
| IGHM           | 3507      | 1.9294555                          | 2.1339972                          | 0.000159                          | 7.28E-05                          |
| CYP1B1         | 1545      | 1.9088015                          | 2.2351386                          | 0.000000286                       | 3.94E-06                          |
| IGLC1          | 3537      | 1.887292                           | 1.940792                           | 0.0165                            | 2.18E-02                          |
| C7             | 730       | 1.870994                           | 2.3569682                          | 0.000000366                       | 8.48E-07                          |
| OR7A10         | 390892    | 1.8120841                          | 1.3723377                          | 0.0000378                         | 1.05E-05                          |
| IGLL1          | 3543      | 1.8020492                          | 1.0546332                          | 0.000541                          | 2.68E-04                          |
| ABCA3          | 21        | 1.7859522                          | 1.5321818                          | 1.71E-10                          | 1.03E-06                          |
| SLC34A2        | 10568     | 1.7747287                          | 2.8237262                          | 2.42E-33                          | 2.52E-35                          |
| ITGBL1         | 9358      | 1.765783                           | 2.338059                           | 8.91E-05                          | 7.94E-05                          |
| ADH1B          | 125       | 1.724882                           | 1.8651                             | 0.000554                          | 1.10E-03                          |
| NKX2-1         | 7080      | 1.710947                           | 2.045118                           | 5.07E-06                          | 1.86E-06                          |
| IGHD           | 3495      | 1.695941                           | 3.129595                           | 2.16E-08                          | 2.00E-09                          |
| IGLV1-44       | 28823     | 1.652244                           | 1.937716                           | 0.0314                            | 1.40E-03                          |
| MGP            | 4256      | 1.636953                           | 1.872567                           | 1.75E-05                          | 3.95E-04                          |
| APOE           | 348       | 1.607058                           | 1.497875                           | 0.000177                          | 3.27E-03                          |
| MARCO          | 8685      | 1.559874                           | 2.677586                           | 2.39E-06                          | 7.13E-11                          |
| SPP1           | 6696      | 1.492127                           | 1.61012                            | 0.00151                           | 5.25E-03                          |
| CLU            | 1191      | 1.487431                           | 1.577097                           | 0.00116                           | 6.74E-03                          |
| CCL19          | 6363      | 1.467586                           | 1.721906                           | 1.02E-05                          | 5.94E-06                          |
| APOC1          | 341       | 1.451887                           | 1.973934                           | 0.000411                          | 1.44E-04                          |
| LOC100653057   | 100653057 | 1.447004                           | 2.004486                           | 5.27E-06                          | 4.24E-05                          |
| IGLL3P         | 91353     | 1.436033                           | 1.811463                           | 0.00226                           | 9.56E-05                          |
| FMO2           | 2327      | 1.393507                           | 1.92863                            | 8.09E-35                          | 1.55E-34                          |
| GUSBP11        | 91316     | 1.311374                           | 1.309558                           | 0.00646                           | 1.21E-03                          |
| POU2AF1        | 5450      | 1.302847                           | 1.392807                           | 0.00114                           | 1.14E-03                          |
| EGFL6          | 25975     | 1.295546                           | 1.345563                           | 3.11E-14                          | 4.65E-12                          |
| CADM1          | 23705     | 1.278576                           | 1.173003                           | 5.68E-10                          | 9.24E-05                          |
| BMS1P20        | 96610     | 1.276755                           | 1.696582                           | 0.0101                            | 3.10E-04                          |
| IGHV4-31       | 28396     | 1.267629                           | 1.405921                           | 0.0401                            | 1.06E-02                          |
| HBA2           | 3040      | 1.257768                           | 1.396487                           | 0.000414                          | 1.96E-02                          |
| PTGIS          | 5740      | 1.193255                           | 1.406424                           | 0.000233                          | 4.19E-04                          |
| CYAT1          | 100290481 | 1.17631                            | 1.862045                           | 0.00932                           | 5.49E-03                          |
| LTBP2          | 4053      | 1.175268                           | 1.222965                           | 3.71E-10                          | 1.01E-06                          |

|           |           |          |          |          |          |
|-----------|-----------|----------|----------|----------|----------|
| RPS11     | 6205      | 1.153035 | 2.247998 | 2.04E-06 | 1.34E-08 |
| CYP4B1    | 1580      | 1.145366 | 3.421862 | 3.58E-12 | 4.62E-19 |
| PRELP     | 5549      | 1.145163 | 1.95971  | 1.07E-07 | 2.57E-05 |
| MIR8071-2 | 102466889 | 1.144333 | 1.69677  | 0.00571  | 1.02E-02 |
| BGN       | 633       | 1.125545 | 1.557654 | 2.34E-05 | 5.46E-05 |
| C4BPA     | 722       | 1.103133 | 1.649178 | 2.35E-08 | 3.42E-11 |
| IGHV3-23  | 28442     | 1.079822 | 1.648242 | 0.0394   | 2.58E-02 |
| ENPP2     | 5168      | 1.073004 | 1.19066  | 1.22E-06 | 1.73E-04 |
| CLDN5     | 7122      | 1.069629 | 1.454305 | 1.51E-06 | 8.59E-05 |
| IGLJ3     | 28831     | 1.061169 | 1.698304 | 0.0245   | 1.29E-02 |
| PTP4A3    | 11156     | 1.057674 | 1.339006 | 1.43E-06 | 3.98E-06 |
| BNIP3     | 664       | 1.053185 | 1.356462 | 0.000809 | 3.53E-03 |
| MYH10     | 4628      | 1.025988 | 1.488319 | 8.68E-07 | 1.48E-04 |
| RPL37A    | 6168      | 1.018398 | 1.154699 | 7.97E-09 | 5.73E-08 |
| SLIT2     | 9353      | 1.012822 | 1.130593 | 1.29E-10 | 3.15E-07 |
| SERPINB3  | 6317      | 1.007778 | 1.449198 | 0.0029   | 4.17E-04 |
| CNGB1     | 1258      | 1.002436 | 1.053638 | 7.31E-11 | 3.00E-04 |

---
