# Supplementary material for: Identification of hub genes and pathways in lung metastatic colorectal cancer
Source: PubMed Central journal article supplement (PMC10080892; doi:10.1186/s12885-023-10792-8), 2023-04-06
Supplement: 12885_2023_10792_MOESM6_ESM.pdf [file 12885_2023_10792_MOESM6_ESM.pdf]

**Table S3. The eighteen downregulated DEGs in the GSE41258 and GSE68468 dataset**

| Gene<br>Symbol | Gene ID | Log <sub>2</sub> FC<br>in GSE41258 | Log <sub>2</sub> FC<br>in GSE68468 | Adj <i>P</i> Value<br>in GSE41258 | Adj <i>P</i> Value<br>in GSE68468 |
|----------------|---------|------------------------------------|------------------------------------|-----------------------------------|-----------------------------------|
| MAB21L2        | 10586   | -2.5946                            | -2.17959                           | 7.00E-16                          | 1.34E-11                          |
| SPINK4         | 27290   | -2.47337                           | -1.77526                           | 0.000208                          | 4.38E-03                          |
| MMP3           | 4314    | -2.23088                           | -2.44694                           | 1.34E-08                          | 3.36E-08                          |
| MUC2           | 4583    | -1.79232                           | -1.61319                           | 0.00453                           | 2.23E-02                          |
| PLA2G2A        | 5320    | -1.77058                           | -1.55786                           | 0.00415                           | 8.60E-03                          |
| ZG16           | 653808  | -1.66785                           | -1.52806                           | 0.00478                           | 3.30E-02                          |
| CXCL14         | 9547    | -1.60283                           | -1.28666                           | 0.000317                          | 4.96E-02                          |
| NMU            | 10874   | -1.45997                           | -2.03069                           | 0.000296                          | 1.06E-03                          |
| PCK1           | 5105    | -1.40534                           | -1.17076                           | 0.0113                            | 5.76E-02                          |
| FUT6           | 2528    | -1.37873                           | -1.42724                           | 0.000207                          | 1.02E-02                          |
| ACTG2          | 72      | -1.29196                           | -1.23175                           | 0.00191                           | 6.60E-03                          |
| ADAMDEC1       | 27299   | -1.25617                           | -1.0073                            | 0.000316                          | 1.99E-02                          |
| BAX            | 581     | -1.24235                           | -1.58579                           | 6.89E-07                          | 6.11E-10                          |
| GREM1          | 26585   | -1.20482                           | -1.18975                           | 0.000545                          | 0.00259                           |
| CXCL5          | 6374    | -1.17421                           | -1.4844                            | 0.0379                            | 5.76E-02                          |
| DES            | 1674    | -1.08758                           | -1.77719                           | 0.0143                            | 4.17E-03                          |
| ABHD2          | 11057   | -1.04661                           | -1.29764                           | 0.00104                           | 0.000564                          |
| CLIC4          | 25932   | -1.04147                           | -1.17762                           | 0.0000102                         | 0.00013                           |
